# Supplementary material for: Single-cell analysis of cell fate bifurcation in the chordate Ciona
Source: PubMed Central journal article supplement (PMC8408944; doi:10.1186/s12915-021-01122-0), 2021-08-31

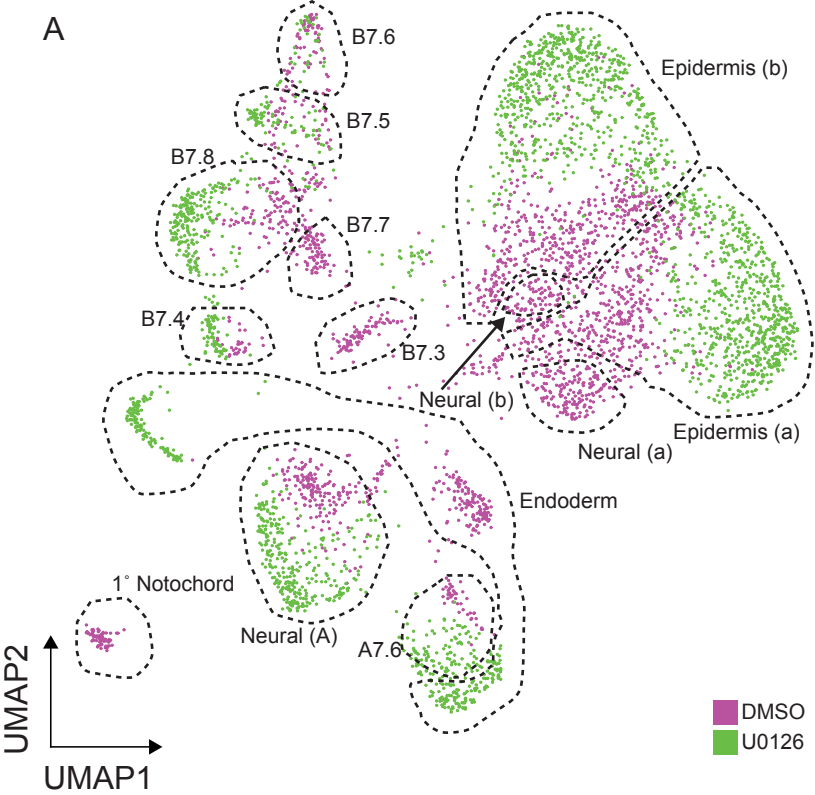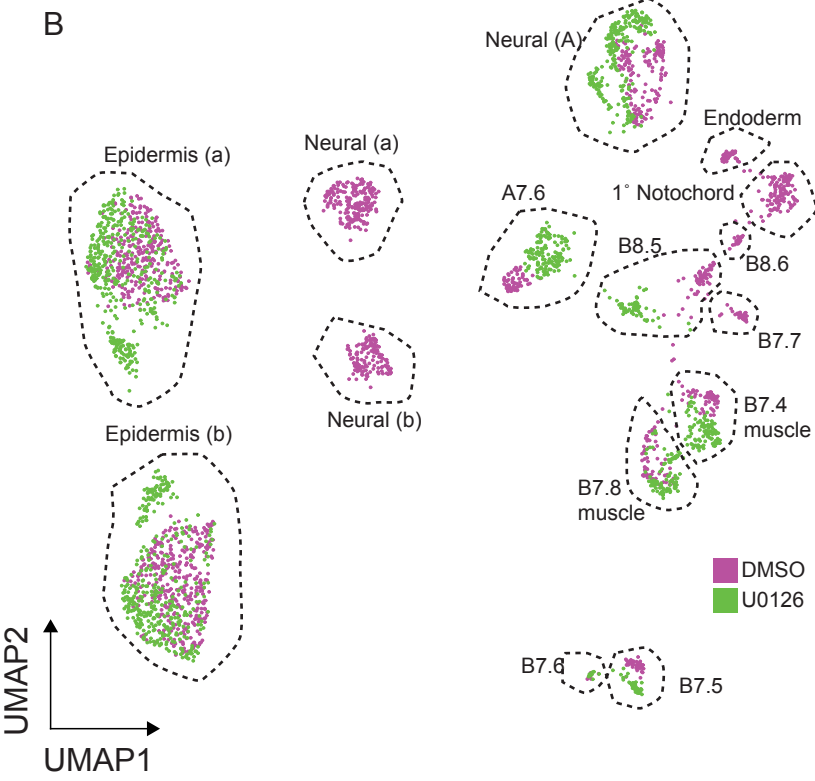

Supplement: 12915_2021_1122_MOESM6_ESM.pdf [file 12915_2021_1122_MOESM6_ESM.pdf]
